# Supplementary material for: Facile Preparation of Organo-Modified ZnO/Attapulgite Nanocomposites Loaded with Monoammonium Glycyrrhizinate via Mechanical Milling and Their Synergistic Antibacterial Effect
Source: MDPI journal article supplement (doi:10.3390/min12030364), 2022-03-16
Supplement: s1 [file s1]

# Supplementary Materials: Facile preparation of organo-modified ZnO/attapulgite nano-composites loaded with mono-ammonium glycyrrhizinate via mechanical milling and their synergistic antibacterial effect

Fangfang Yang, Yameng Song, Aiping Hui, Yuru Kang, Yanmin Zhou and Aiqin Wang\*

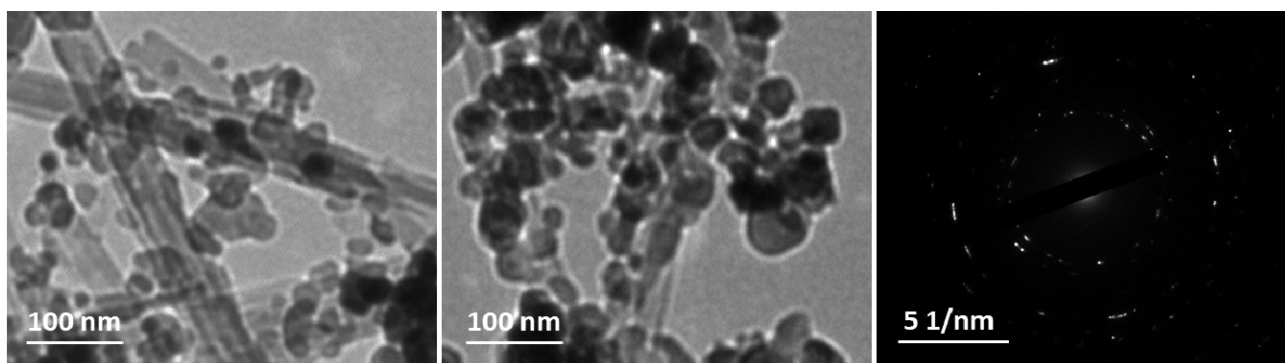

Figure S1. TEM images and SAED pattern of ZnO/APT.

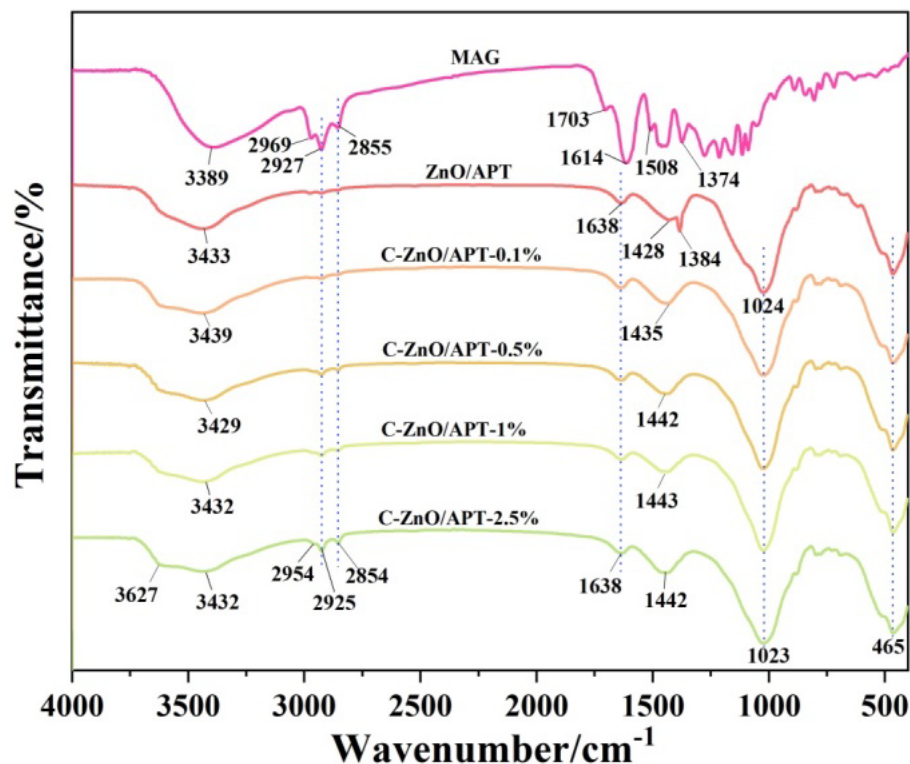

Figure S2. FTIR spectra of MAG, ZnO/APT and C-ZnO/APT nanocomposites with CTAB concentrations of 0.1%, 0.5%, 1% and 2.5%.

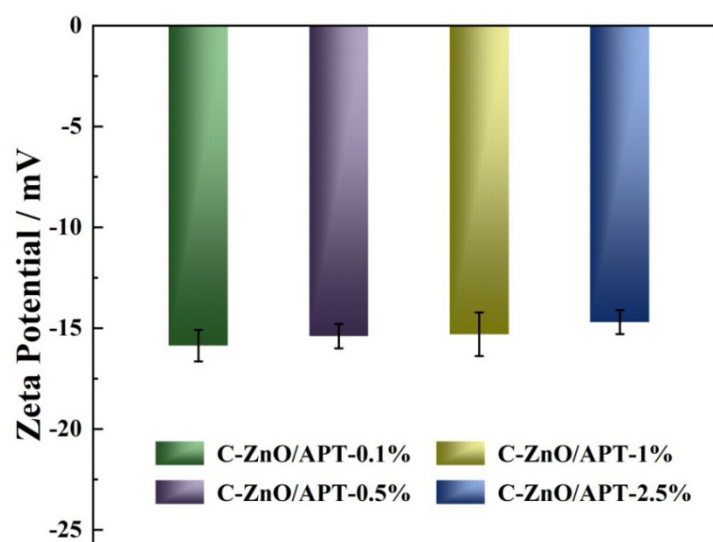

**Figure S3.** Zeta potential of C-ZnO/APT nanocomposites with CTAB concentrations of 0.1%, 0.5%, 1% and 2.5%.

**Table S1.** MIC values of MAG, ZnO/APT, and MAG/C-ZnO/APT nanocomposites toward *E. coli* and *S. aureus*.

| Samples            | Antibacterial activity (MIC in mg/mL) |                  |
|--------------------|---------------------------------------|------------------|
|                    | <i>E. coli</i>                        | <i>S. aureus</i> |
| MAG                | 10                                    | 5                |
| ZnO/APT            | 10                                    | 2.5              |
| MAG/ZnO/APT        | 10                                    | 1                |
| MAG/C-ZnO/APT-0.1% | >5                                    | 0.5              |
| MAG/C-ZnO/APT-0.5% | 5                                     | 0.5              |
| MAG/C-ZnO/APT-1%   | 2.5                                   | 0.25             |
| MAG/C-ZnO/APT-2.5% | 1                                     | 0.1              |

**Table S2.** MIC values of C-ZnO/APT nanocomposites against *E. coli* and *S. aureus*.

| Samples        | Antibacterial activity (MIC in mg/mL) |                  |
|----------------|---------------------------------------|------------------|
|                | <i>E. coli</i>                        | <i>S. aureus</i> |
| C-ZnO/APT-0.1% | >5                                    | 1                |
| C-ZnO/APT-0.5% | 5                                     | 0.5              |
| C-ZnO/APT-1%   | 5                                     | 0.25             |
| C-ZnO/APT-2.5% | 2.5                                   | 0.1              |

**Table S3.** Comparison of our MAG/C-ZnO/APT nanocomposite with the reported antibacterial nanocomposites.

| Nanocomposites               | Preparation method                  | MIC values                                                          | Ref.       |
|------------------------------|-------------------------------------|---------------------------------------------------------------------|------------|
| ZnO/Pal                      | Hydrothermal method                 | 1.5 mg/mL for <i>E. coli</i><br>5 mg/mL for <i>S. aureus</i>        | [1]        |
| ZnO/Pal                      | Hydrothermal method                 | 1.5 mg/mL for <i>E. coli</i><br>0.5 mg/mL for <i>S. aureus</i>      | [2]        |
| ZnO/kaoline (50 wt.% of ZnO) | -                                   | 0.41 mg/mL for <i>S. aureus</i><br>0.41 mg/ml for <i>S. aureus</i>  | [3]        |
| ZnO/graphite (50 wt.%)       | -                                   | 11.1 mg/mL for <i>E. coli</i><br>100 mg/mL for <i>P. aeruginosa</i> | [4]        |
| QACOS/ZnO/Pal                | Electrostatic self-assembly process | 0.5 mg/mL for <i>E. coli</i><br>1 mg/mL for <i>S. aureus</i>        | [5]        |
| CAR/ZnO/PAL                  | adsorption process                  | 0.5 mg/mL for <i>E. coli</i><br>1.5 mg/mL for <i>S. aureus</i>      | [6]        |
| MAG/C-ZnO/APT                | Mechanical milling method           | 1 mg/mL for <i>E. coli</i><br>0.1 mg/mL for <i>S. aureus</i>        | This study |

## References

1. A. Hui, S. Dong, Y. Kang, Y. Zhou, A. Wang, Hydrothermal fabrication of spindle-shaped ZnO/palygorskite nanocomposites using nonionic surfactant for enhancement of antibacterial activity, *Nanomaterials* 9 (2019) 1453-1465. <https://doi.org/10.3390/nano9101453>.
2. A. Hui, R. Yan, B. Mu, Y. Kang, Y. Zhou, A. Wang, Preparation and antibacterial activity of ZnO/palygorskite nanocomposites using different types of surfactants, *J. Inorg. Organomet. Polym. Mater.* 30 (2020) 3808-3817. <https://doi.org/10.1007/s10904-020-01613-7>.
3. K. Dedkova, B. Janikova, K. Matejova, P. Peikertova, L. Neuwirthova, J. Holesinsky, J. Kukutschova, Preparation, characterization and antibacterial properties of ZnO/kaoline nanocomposites, *J. Photochem. Photobiol. B* 148 (2015) 113-117. <https://doi.org/10.1016/j.jphotobiol.2015.03.034>.
4. K. Dedkova, B. Janikova, K. Matejova, K. Cabanova, R. Vana, A. Kalup, M. Hundakova, J. Kukutschova, ZnO/graphite composites and its antibacterial activity at different conditions, *J. Photochem. Photobiol. B* 151 (2015) 256-263. <https://doi.org/10.1016/j.jphotobiol.2015.08.017>.
5. R.Y. Aiping Hui, Wenbo Wang, Qin Wang, Yanmin Zhou, Aiqin Wang, Incorporation of quaternary ammonium chitooligosaccharides on ZnO/palygorskite nanocomposites for enhancing antibacterial activities, *Carbohydr. Polym.* 247 (2020) 116685. <https://doi.org/10.1016/j.carbpol.2020.116685>.
6. A. Hui, F. Yang, R. Yan, Y. Kang, A. Wang, Palygorskite-Based Organic-Inorganic Hybrid Nanocomposite for Enhanced Antibacterial Activities, *Nanomaterials* 11 (2021) 3230. <https://doi.org/10.3390/nano11123230>.
